# Supplementary material for: Comparing 3 Approaches for Making Vaccine Adoption Decisions in Thailand
Source: PubMed Central journal article supplement (PMC7719214; doi:10.15171/ijhpm.2020.01), 2020-01-20
Supplement: ijhpm-9-439-s001.pdf [file ijhpm-9-439-s001.pdf]

## Supplementary file 1

**Table S1.** Input Variables Required for Populating the TSE Model

| <b>Variables</b>                                                      | <b>Description</b>                                                                                                               |
|-----------------------------------------------------------------------|----------------------------------------------------------------------------------------------------------------------------------|
| Size of target population                                             | Size of birth cohort                                                                                                             |
| Coverage of existing vaccines for different population segments       | Coverage of existing BCG/DTP1-3 vaccines in Thailand by wealth quintiles and administrative regions                              |
| Vaccine schedules with which rotavirus is expected to be administered | Schedule of BCG and DTP 1,2,3 vaccine programs                                                                                   |
| Mortality rates                                                       | Background mortality, infant mortality and neonatal mortality                                                                    |
| Disease incidence and related statistics                              | Incidence of rotavirus infection by severity levels and related mortality                                                        |
| Use of healthcare services                                            | Distribution of inpatient and outpatient visits by healthcare setting - primary, secondary, tertiary and healthcare centres      |
| Healthcare costs                                                      | Healthcare costs for outpatient and inpatient cases by health care setting – primary, secondary, tertiary and healthcare centres |
| Adverse events incidence                                              | Background intussusception rate per 100,000                                                                                      |
| Vaccine storage and delivery                                          | Thailand specific costs for vaccine transport and storage                                                                        |

Abbreviations: DTP, a combined vaccine against diphtheria, tetanus, and pertussis; BCG, Bacille Calmette Guerin vaccine.

**Table S2.** Characteristics of the 5 Hypothetical Rotavirus Vaccine Products

| Vaccine characteristics                                     | Rotavirus vaccine products* |            |       |            |         |
|-------------------------------------------------------------|-----------------------------|------------|-------|------------|---------|
|                                                             | RVV-1                       | RVV-2      | RVV-3 | RVV-4      | RVV-5   |
| Number of doses needed                                      | 3                           | 2          | 1     | 3          | 3       |
| Vaccine efficacy                                            | 50%                         | 50%        | 65%   | 60%        | 72%     |
| Duration of protection (weeks)**                            | 52                          | 52         | 52    | 78         | 52      |
| Dosing schedule of first dose                               | DTP-1                       | DTP-1      | DTP-1 | BCG        | DTP-1   |
| Price per dose (USD)                                        | 3.6                         | 2.2        | 5     | 8.2        | 6.1     |
| Doses per vial                                              | 1                           | 1          | 1     | 2          | 1       |
| Volume of the vaccine per dose (cm <sup>3</sup> )           | 46.3                        | 17.6       | 24.3  | 22.1       | 34.2    |
| Does it need a diluent?                                     | Yes                         | Yes        | No    | No         | Yes     |
| Volume of diluent/ other component (cm <sup>3</sup> )       | 45                          | 17.6       | -     | -          | 42      |
| Is an injection syringe/ applicator required?               | No                          | Yes        | No    | No         | Yes     |
| Volume of injection syringe (cm <sup>3</sup> )              | -                           | 2          | -     | -          | 12      |
| Price of injection syringe/ applicator (USD)                | -                           | 0.04       | -     | -          | 0.02    |
| Is a reconstitution syringe/adaptor required?               | No                          | No         | No    | No         | Yes     |
| Volume of reconstitution syringe/adaptor (cm <sup>3</sup> ) | -                           | -          | -     | -          | 21      |
| Price of reconstitution syringe/ applicator                 | -                           | -          | -     | -          | 0.01    |
| Method of cooling, Vaccine                                  |                             |            |       |            |         |
| National level                                              | Cold chain                  | Cold chain | CTC   | Cold chain | Freezer |
| Regional level                                              | Cold chain                  | Cold chain | CTC   | Cold chain | Freezer |

| Vaccine characteristics                                                                                                                                                                                                                            | Rotavirus vaccine products* |            |       |            |         |
|----------------------------------------------------------------------------------------------------------------------------------------------------------------------------------------------------------------------------------------------------|-----------------------------|------------|-------|------------|---------|
|                                                                                                                                                                                                                                                    | RVV-1                       | RVV-2      | RVV-3 | RVV-4      | RVV-5   |
| District level                                                                                                                                                                                                                                     | Cold chain                  | Cold chain | CTC   | Cold chain | Freezer |
| Health centre level                                                                                                                                                                                                                                | Cold chain                  | Cold chain | CTC   | Cold chain | Freezer |
| Method of cooling, Diluent                                                                                                                                                                                                                         |                             |            |       |            |         |
| National level                                                                                                                                                                                                                                     | Cold chain                  | Cold chain | -     | -          | Freezer |
| Regional level                                                                                                                                                                                                                                     | Cold chain                  | Cold chain | -     | -          | Freezer |
| District level                                                                                                                                                                                                                                     | Cold chain                  | Cold chain | -     | -          | Freezer |
| Health centre level                                                                                                                                                                                                                                | Cold chain                  | Cold chain | -     | -          | Freezer |
| Relative risk of a intussusception adverse event in the 1-7 days risk period                                                                                                                                                                       |                             |            |       |            |         |
| Dose 1                                                                                                                                                                                                                                             | 6                           | 4.2        | 3     | 2          | 3       |
| Dose 2                                                                                                                                                                                                                                             | 3                           | 2          | -     | 1          | 1       |
| Dose 3                                                                                                                                                                                                                                             | 1.7                         | -          | -     | 1          | 1       |
| Relative risk of a intussusception adverse event in the 8-21 days risk period                                                                                                                                                                      |                             |            |       |            |         |
| Dose 1                                                                                                                                                                                                                                             | 1.5                         | 1.4        | 0     | 1.2        | 1.1     |
| Dose 2                                                                                                                                                                                                                                             | 1                           | 1          | -     | 1          | 1       |
| Dose 3                                                                                                                                                                                                                                             | 1                           | -          | -     | 1          | 1       |
| Wastage                                                                                                                                                                                                                                            | 5%                          | 5%         | 5%    | 5%         | 5%      |
| Buffer vaccines                                                                                                                                                                                                                                    | 10%                         | 10%        | 10%   | 10%        | 10%     |
| *All 5 vaccine products considered are hypothetical                                                                                                                                                                                                |                             |            |       |            |         |
| **The mean duration of protection offered by the vaccine product                                                                                                                                                                                   |                             |            |       |            |         |
| Abbreviations: cm <sup>3</sup> , cubic centimetre; CTC, controlled temperature chain; DTP, a combined vaccine against diphtheria, tetanus, and pertussis; BCG, Bacille Calmette Guerin vaccine; RVV, rotavirus vaccine; USD, United States Dollar. |                             |            |       |            |         |

**Table S3.** Scores and ranks for the 5 hypothetical rotavirus vaccine products using the TSE approach

| <b>Absolute scores</b>   |                |                       |                       |                       |                       |                       |
|--------------------------|----------------|-----------------------|-----------------------|-----------------------|-----------------------|-----------------------|
| <b>Decision criteria</b> |                | RVV1                  | RVV2                  | RVV3                  | RVV4                  | RVV5                  |
| Safety                   |                | 0                     | 42                    | 77                    | 83                    | 74                    |
| Health impact            |                | 17                    | 17                    | 23                    | 34                    | 24                    |
| Delivery costs           |                | 7                     | 79                    | 98                    | 65                    | 0                     |
| Cost-effectiveness       |                | 0                     | 61                    | 27                    | 0                     | 0                     |
| Budget impact            |                | 54                    | 85                    | 87                    | 0                     | 26                    |
| <b>Weighted scores</b>   |                |                       |                       |                       |                       |                       |
| <b>Decision criteria</b> | <b>Weights</b> | RVV1                  | RVV2                  | RVV3                  | RVV4                  | RVV5                  |
| Safety                   | 20%            | 0                     | 8                     | 15                    | 17                    | 15                    |
| Health impact            | 20%            | 3                     | 3                     | 5                     | 7                     | 5                     |
| Delivery costs           | 20%            | 8                     | 17                    | 20                    | 15                    | 0                     |
| Cost-effectiveness       | 20%            | 0                     | 12                    | 15                    | 0                     | 0                     |
| Budget impact            | 20%            | 11                    | 17                    | 17                    | 0                     | 5                     |
| Aggregate weighted score |                | 22                    | 58                    | 72                    | 39                    | 25                    |
| <b>Vaccine ranking</b>   |                | <b>5<sup>th</sup></b> | <b>2<sup>nd</sup></b> | <b>1<sup>st</sup></b> | <b>3<sup>rd</sup></b> | <b>4<sup>th</sup></b> |

RVV, rotavirus vaccine
